# Supplementary material for: Identification of the Tembusu Virus in Mosquitoes in Northern Thailand
Source: MDPI journal article supplement (doi:10.3390/v15071447), 2023-06-27
Supplement: s1 [file s1]

Table S1. The first ten hits alignment of sample P49\_TH\_2019 and P73\_TH\_2019 obtained using NCBI BLAST® website.

P49 TH 2019

| Description                                                                | Scientific Name | Max Score | Total Score | Query Cover | E value | Per. Ident | Acc. Len | Accession  |
|----------------------------------------------------------------------------|-----------------|-----------|-------------|-------------|---------|------------|----------|------------|
| Tembusu virus isolate TMUV KAN2016 NS5 gene, partial cds                   | Tembusu virus   | 385       | 385         | 99%         | 2e-102  | 97.36%     | 239      | KX184310.1 |
| Tembusu virus strain HNU-NX2-2019, complete genome                         | Tembusu virus   | 368       | 368         | 99%         | 2e-97   | 96.04%     | 10994    | OP186478.1 |
| Tembusu virus isolate YN12193 polyprotein gene, complete cds               | Tembusu virus   | 368       | 368         | 99%         | 2e-97   | 96.04%     | 10278    | KT607936.1 |
| Tembusu virus strain GX2021, complete genome                               | Tembusu virus   | 363       | 363         | 99%         | 1e-95   | 95.59%     | 10994    | OM240641.1 |
| Tembusu virus strain SD2021, complete genome                               | Tembusu virus   | 359       | 359         | 98%         | 1e-94   | 95.56%     | 10995    | OM240640.1 |
| Tembusu virus strain CTLN, complete genome                                 | Tembusu virus   | 359       | 359         | 98%         | 1e-94   | 95.56%     | 10995    | MZ355579.1 |
| Tembusu virus isolate YN2020, complete genome                              | Tembusu virus   | 353       | 353         | 98%         | 7e-93   | 95.11%     | 10994    | OQ238827.1 |
| Tembusu virus clone 4790 NS5 protein gene, partial cds                     | Tembusu virus   | 348       | 348         | 90%         | 3e-91   | 97.10%     | 232      | MT125024.1 |
| Tembusu virus strain Thai-JSL385 nonstructural protein 5 gene, partial cds | Tembusu virus   | 342       | 342         | 88%         | 1e-89   | 97.51%     | 213      | KC810851.1 |
| Tembusu virus isolate YN12115 polyprotein gene, complete cds               | Tembusu virus   | 340       | 340         | 99%         | 5e-89   | 93.83%     | 10278    | KT607935.1 |

P73 TH 2019

| Description                                                  | Scientific Name | Max Score | Total Score | Query Cover | E value | Per. Ident | Acc. Len | Accession  |
|--------------------------------------------------------------|-----------------|-----------|-------------|-------------|---------|------------|----------|------------|
| Tembusu virus strain GX2021, complete genome                 | Tembusu virus   | 459       | 459         | 100%        | 2e-124  | 98.83%     | 10994    | OM240641.1 |
| Tembusu virus strain SD2021, complete genome                 | Tembusu virus   | 453       | 453         | 100%        | 8e-123  | 98.44%     | 10995    | OM240640.1 |
| Tembusu virus strain CTLN, complete genome                   | Tembusu virus   | 453       | 453         | 100%        | 8e-123  | 98.44%     | 10995    | MZ355579.1 |
| Tembusu virus isolate YN2020, complete genome                | Tembusu virus   | 448       | 448         | 100%        | 4e-121  | 98.05%     | 10994    | OQ238827.1 |
| Tembusu virus isolate YN12193 polyprotein gene, complete cds | Tembusu virus   | 442       | 442         | 100%        | 2e-119  | 97.67%     | 10278    | KT607936.1 |
| Tembusu virus strain HNU-NX2-2019, complete genome           | Tembusu virus   | 436       | 436         | 100%        | 8e-118  | 97.28%     | 10994    | OP186478.1 |
| Tembusu virus isolate SD14, complete genome                  | Tembusu virus   | 412       | 412         | 99%         | 1e-110  | 95.70%     | 11001    | MH748542.1 |
| Tembusu virus isolate TMUV KAN2016 NS5 gene, partial cds     | Tembusu virus   | 409       | 409         | 88%         | 2e-109  | 99.12%     | 239      | KX184310.1 |
| Tembusu virus clone 4790 NS5 protein gene, partial cds       | Tembusu virus   | 405       | 405         | 89%         | 2e-108  | 98.27%     | 232      | MT125024.1 |
| Tembusu virus isolate YN12115 polyprotein gene, complete cds | Tembusu virus   | 392       | 392         | 100%        | 2e-104  | 94.16%     | 10278    | KT607935.1 |
